# Supplementary material
Source: MDPI journal article supplement (https://www.mdpi.com/2674-1024/3/1/1)
Supplement: s1 [file s1]

**Table S1:** The environmental data of *Pinus oocarpa* trees in the Southern Mountains of Oaxaca, Mexico.

| Provenance | Tree ID | elev | mat  | map  | gsp  | mtcm | mmin | mtwm | mmax | sday | fday | ffp | dd5  | gsdd5 | d100 | smrpb | smrsrpb | sprp | smrp | winp | adi1  | ami    | sdi    | smi    |
|------------|---------|------|------|------|------|------|------|------|------|------|------|-----|------|-------|------|-------|---------|------|------|------|-------|--------|--------|--------|
| Rosario    | CDR01   | 917  | 24.0 | 1577 | 1382 | 22.5 | 15.1 | 25.8 | 33.5 | 4    | 359  | 354 | 6866 | 6713  | 6    | 2.12  | 4.77    | 124  | 591  | 51   | 4.354 | 0.053  | 4.968  | 4.857  |
| Rosario    | CDR02   | 923  | 24.0 | 1583 | 1387 | 22.4 | 15.1 | 25.7 | 33.4 | 4    | 359  | 354 | 6854 | 6701  | 6    | 2.12  | 4.74    | 125  | 593  | 51   | 4.330 | 0.052  | 4.942  | 4.831  |
| Rosario    | CDR03   | 917  | 24.1 | 1577 | 1382 | 22.5 | 15.1 | 25.8 | 33.5 | 4    | 359  | 354 | 6869 | 6716  | 6    | 2.12  | 4.77    | 124  | 591  | 51   | 4.356 | 0.053  | 4.970  | 4.860  |
| Rosario    | CDR04   | 945  | 23.9 | 1603 | 1403 | 22.3 | 15.0 | 25.6 | 33.2 | 4    | 359  | 354 | 6804 | 6652  | 6    | 2.11  | 4.72    | 127  | 600  | 54   | 4.245 | 0.051  | 4.850  | 4.741  |
| Rosario    | CDR05   | 910  | 24.1 | 1564 | 1371 | 22.5 | 15.1 | 25.9 | 33.6 | 4    | 359  | 354 | 6893 | 6739  | 6    | 2.13  | 4.81    | 122  | 587  | 50   | 4.407 | 0.053  | 5.028  | 4.915  |
| Rosario    | CDR06   | 942  | 23.9 | 1597 | 1399 | 22.3 | 15.0 | 25.6 | 33.3 | 4    | 359  | 354 | 6810 | 6658  | 6    | 2.11  | 4.71    | 127  | 598  | 52   | 4.264 | 0.052  | 4.868  | 4.759  |
| Rosario    | CDR07   | 934  | 24.0 | 1587 | 1391 | 22.4 | 15.1 | 25.7 | 33.4 | 4    | 359  | 354 | 6837 | 6684  | 6    | 2.12  | 4.76    | 125  | 595  | 51   | 4.308 | 0.052  | 4.915  | 4.805  |
| Rosario    | CDR08   | 980  | 23.6 | 1642 | 1435 | 22.1 | 14.9 | 25.2 | 32.8 | 4    | 360  | 353 | 6708 | 6575  | 6    | 2.1   | 4.69    | 131  | 615  | 57   | 4.085 | 0.050  | 4.675  | 4.582  |
| Rosario    | CDR09   | 1002 | 23.5 | 1674 | 1460 | 21.9 | 14.8 | 25.0 | 32.6 | 4    | 360  | 354 | 6655 | 6523  | 6    | 2.08  | 4.6     | 136  | 625  | 61   | 3.976 | 0.049  | 4.558  | 4.468  |
| Rosario    | CDR10   | 959  | 23.8 | 1619 | 1415 | 22.2 | 15.0 | 25.4 | 33.1 | 4    | 359  | 353 | 6768 | 6617  | 6    | 2.11  | 4.73    | 128  | 606  | 56   | 4.180 | 0.051  | 4.783  | 4.676  |
| Rosario    | CDR11   | 946  | 23.9 | 1605 | 1405 | 22.3 | 15.0 | 25.5 | 33.2 | 4    | 359  | 354 | 6798 | 6646  | 6    | 2.12  | 4.74    | 127  | 602  | 54   | 4.236 | 0.051  | 4.838  | 4.730  |
| Rosario    | CDR12   | 938  | 23.9 | 1598 | 1400 | 22.3 | 15.0 | 25.6 | 33.3 | 4    | 359  | 354 | 6813 | 6661  | 6    | 2.11  | 4.72    | 127  | 599  | 52   | 4.263 | 0.052  | 4.866  | 4.758  |
| Rosario    | CDR13   | 916  | 24.1 | 1577 | 1381 | 22.5 | 15.1 | 25.8 | 33.5 | 4    | 359  | 354 | 6872 | 6719  | 6    | 2.12  | 4.77    | 124  | 591  | 51   | 4.358 | 0.053  | 4.976  | 4.865  |
| Rosario    | CDR14   | 887  | 24.3 | 1548 | 1358 | 22.6 | 15.2 | 26.1 | 33.8 | 5    | 359  | 353 | 6944 | 6772  | 6    | 2.14  | 4.84    | 120  | 581  | 48   | 4.486 | 0.054  | 5.113  | 4.987  |
| Rosario    | CDR15   | 827  | 24.7 | 1500 | 1319 | 22.9 | 15.4 | 26.6 | 34.5 | 5    | 359  | 353 | 7087 | 6912  | 6    | 2.14  | 4.9     | 115  | 564  | 43   | 4.725 | 0.056  | 5.373  | 5.240  |
| Rosario    | CDR16   | 873  | 24.4 | 1529 | 1343 | 22.7 | 15.2 | 26.2 | 34.0 | 5    | 359  | 353 | 6985 | 6813  | 6    | 2.14  | 4.86    | 118  | 574  | 46   | 4.568 | 0.055  | 5.201  | 5.073  |
| Rosario    | CDR17   | 878  | 24.4 | 1534 | 1347 | 22.7 | 15.2 | 26.2 | 34.0 | 5    | 359  | 353 | 6977 | 6804  | 6    | 2.13  | 4.84    | 119  | 576  | 47   | 4.548 | 0.054  | 5.180  | 5.051  |
| Rosario    | CDR18   | 876  | 24.3 | 1542 | 1353 | 22.7 | 15.2 | 26.1 | 34.0 | 5    | 359  | 353 | 6959 | 6786  | 6    | 2.11  | 4.74    | 122  | 578  | 49   | 4.513 | 0.054  | 5.143  | 5.016  |
| Rosario    | CDR19   | 870  | 24.4 | 1528 | 1343 | 22.7 | 15.3 | 26.2 | 34.0 | 5    | 359  | 353 | 6985 | 6813  | 6    | 2.14  | 4.86    | 118  | 574  | 45   | 4.571 | 0.055  | 5.201  | 5.073  |
| Rosario    | CDR20   | 877  | 24.4 | 1532 | 1344 | 22.7 | 15.2 | 26.2 | 34.0 | 5    | 359  | 353 | 6977 | 6804  | 6    | 2.14  | 4.86    | 118  | 574  | 47   | 4.554 | 0.055  | 5.191  | 5.063  |
| Rosario    | CDR21   | 884  | 24.3 | 1545 | 1356 | 22.6 | 15.2 | 26.1 | 33.9 | 5    | 359  | 353 | 6944 | 6772  | 6    | 2.11  | 4.75    | 122  | 579  | 49   | 4.494 | 0.054  | 5.121  | 4.994  |
| Rosario    | CDR22   | 870  | 24.4 | 1523 | 1339 | 22.7 | 15.3 | 26.2 | 34.1 | 5    | 359  | 353 | 6989 | 6816  | 6    | 2.14  | 4.85    | 118  | 572  | 45   | 4.589 | 0.055  | 5.220  | 5.090  |
| Rosario    | CDR24   | 855  | 24.5 | 1509 | 1326 | 22.8 | 15.3 | 26.4 | 34.2 | 5    | 359  | 353 | 7030 | 6857  | 6    | 2.14  | 4.88    | 116  | 566  | 45   | 4.659 | 0.056  | 5.302  | 5.171  |
| Rosario    | CDR25   | 867  | 24.4 | 1514 | 1331 | 22.7 | 15.3 | 26.3 | 34.1 | 5    | 359  | 353 | 7003 | 6830  | 6    | 2.14  | 4.85    | 117  | 568  | 45   | 4.625 | 0.055  | 5.261  | 5.131  |
| Rosario    | CDR26   | 872  | 24.4 | 1518 | 1335 | 22.7 | 15.2 | 26.2 | 34.1 | 5    | 359  | 353 | 6989 | 6816  | 6    | 2.13  | 4.83    | 118  | 570  | 45   | 4.604 | 0.055  | 5.235  | 5.106  |
| Rosario    | CDR27   | 886  | 24.3 | 1540 | 1351 | 22.6 | 15.2 | 26.1 | 33.9 | 5    | 359  | 353 | 6950 | 6778  | 6    | 2.13  | 4.86    | 119  | 578  | 48   | 4.513 | 0.054  | 5.144  | 5.017  |
| Rosario    | CDR28   | 860  | 24.5 | 1509 | 1326 | 22.8 | 15.3 | 26.4 | 34.2 | 5    | 359  | 353 | 7024 | 6851  | 6    | 2.14  | 4.88    | 116  | 566  | 45   | 4.655 | 0.056  | 5.297  | 5.167  |
| Sesteadero | SES02   | 843  | 24.3 | 1609 | 1413 | 22.8 | 15.4 | 26.1 | 33.9 | 5    | 359  | 353 | 6970 | 6797  | 6    | 2.11  | 4.79    | 127  | 608  | 49   | 4.332 | 0.052  | 4.933  | 4.810  |
| Sesteadero | SES03   | 847  | 24.3 | 1613 | 1416 | 22.8 | 15.4 | 26.1 | 33.8 | 5    | 359  | 353 | 6965 | 6791  | 6    | 2.12  | 4.8     | 127  | 610  | 49   | 4.318 | 0.052  | 4.919  | 4.796  |
| Sesteadero | SES04   | 1087 | 22.2 | 1932 | 1672 | 20.8 | 14.5 | 23.5 | 30.7 | 4    | 361  | 357 | 6219 | 6110  | 6    | 2     | 4.3     | 169  | 726  | 85   | 3.219 | 0.041  | 3.719  | 3.654  |
| Sesteadero | SES06   | 1034 | 22.7 | 1841 | 1601 | 21.2 | 14.7 | 24.1 | 31.5 | 4    | 360  | 356 | 6395 | 6268  | 6    | 2.03  | 4.39    | 158  | 694  | 74   | 3.474 | 0.043  | 3.994  | 3.915  |
| Sesteadero | SES07   | 847  | 24.3 | 1617 | 1420 | 22.8 | 15.4 | 26.0 | 33.8 | 5    | 359  | 353 | 6952 | 6779  | 6    | 2.12  | 4.82    | 127  | 612  | 49   | 4.299 | 0.052  | 4.896  | 4.774  |
| Sesteadero | SES11   | 826  | 24.5 | 1599 | 1403 | 22.9 | 15.5 | 26.2 | 34.1 | 5    | 359  | 353 | 7012 | 6838  | 6    | 2.12  | 4.83    | 125  | 604  | 49   | 4.39  | 0.0524 | 4.9979 | 4.8738 |
| San Pedro  | SDC30   | 1114 | 21.9 | 1416 | 1212 | 20.6 | 13.5 | 22.9 | 29.7 | 5    | 361  | 355 | 6093 | 5970  | 7    | 1.66  | 2.68    | 176  | 471  | 60   | 4.303 | 0.055  | 5.027  | 4.926  |

|           |       |      |      |      |      |      |      |      |      |   |     |     |      |      |   |      |      |     |     |    |       |       |       |       |
|-----------|-------|------|------|------|------|------|------|------|------|---|-----|-----|------|------|---|------|------|-----|-----|----|-------|-------|-------|-------|
| San Pedro | SDC31 | 1147 | 21.6 | 1422 | 1219 | 20.3 | 13.2 | 22.7 | 29.4 | 5 | 361 | 357 | 6004 | 5883 | 7 | 1.66 | 2.66 | 178 | 473 | 60 | 4.222 | 0.054 | 4.925 | 4.826 |
| San Pedro | SDC32 | 1133 | 21.7 | 1420 | 1217 | 20.4 | 13.3 | 22.8 | 29.5 | 5 | 361 | 358 | 6039 | 5918 | 7 | 1.66 | 2.67 | 177 | 473 | 60 | 4.253 | 0.055 | 4.962 | 4.863 |
| San Pedro | SDC33 | 1117 | 21.9 | 1411 | 1209 | 20.5 | 13.4 | 22.9 | 29.7 | 5 | 361 | 355 | 6084 | 5961 | 7 | 1.66 | 2.67 | 176 | 470 | 59 | 4.312 | 0.055 | 5.032 | 4.931 |
| San Pedro | SDC34 | 1147 | 21.6 | 1425 | 1222 | 20.3 | 13.2 | 22.7 | 29.4 | 5 | 361 | 357 | 6004 | 5883 | 7 | 1.66 | 2.65 | 179 | 474 | 60 | 4.213 | 0.054 | 4.913 | 4.814 |
| San Pedro | SDC35 | 1127 | 21.8 | 1421 | 1217 | 20.4 | 13.4 | 22.8 | 29.5 | 5 | 361 | 357 | 6051 | 5929 | 7 | 1.66 | 2.67 | 177 | 473 | 60 | 4.258 | 0.055 | 4.972 | 4.872 |
| San Pedro | SDC36 | 1123 | 21.8 | 1421 | 1217 | 20.5 | 13.4 | 22.9 | 29.6 | 5 | 361 | 357 | 6063 | 5941 | 7 | 1.66 | 2.67 | 177 | 473 | 60 | 4.267 | 0.055 | 4.982 | 4.882 |
| San Pedro | SDC37 | 1126 | 21.8 | 1422 | 1218 | 20.4 | 13.4 | 22.8 | 29.5 | 5 | 361 | 357 | 6054 | 5932 | 7 | 1.67 | 2.67 | 177 | 473 | 60 | 4.257 | 0.055 | 4.970 | 4.870 |
| San Pedro | SDC38 | 1108 | 21.9 | 1421 | 1216 | 20.6 | 13.5 | 23.0 | 29.7 | 5 | 361 | 355 | 6102 | 5978 | 7 | 1.67 | 2.69 | 176 | 473 | 60 | 4.294 | 0.055 | 5.018 | 4.916 |
| San Pedro | SDC39 | 1127 | 21.8 | 1425 | 1221 | 20.4 | 13.4 | 22.8 | 29.5 | 5 | 361 | 357 | 6048 | 5926 | 7 | 1.67 | 2.68 | 177 | 475 | 60 | 4.244 | 0.055 | 4.953 | 4.853 |
| San Pedro | SDC40 | 1108 | 21.9 | 1420 | 1215 | 20.6 | 13.5 | 23.0 | 29.7 | 5 | 361 | 355 | 6105 | 5981 | 7 | 1.67 | 2.69 | 176 | 473 | 60 | 4.299 | 0.055 | 5.025 | 4.923 |
| San Pedro | SDC41 | 1129 | 21.8 | 1419 | 1216 | 20.4 | 13.4 | 22.8 | 29.5 | 5 | 361 | 357 | 6045 | 5923 | 7 | 1.66 | 2.67 | 177 | 473 | 60 | 4.260 | 0.055 | 4.971 | 4.871 |
| San Pedro | SDC42 | 1084 | 22.1 | 1409 | 1205 | 20.8 | 13.7 | 23.2 | 29.9 | 5 | 360 | 354 | 6170 | 6030 | 6 | 1.67 | 2.7  | 174 | 470 | 60 | 4.379 | 0.056 | 5.120 | 5.004 |
| San Pedro | SDC43 | 1136 | 21.7 | 1419 | 1216 | 20.4 | 13.3 | 22.8 | 29.5 | 5 | 361 | 357 | 6030 | 5909 | 7 | 1.66 | 2.67 | 177 | 473 | 60 | 4.249 | 0.055 | 4.959 | 4.859 |
| San Pedro | SDC44 | 1203 | 21.2 | 1431 | 1227 | 19.8 | 12.8 | 22.3 | 29.0 | 5 | 362 | 359 | 5843 | 5741 | 7 | 1.64 | 2.6  | 182 | 474 | 62 | 4.083 | 0.053 | 4.762 | 4.679 |
| San Pedro | SDC45 | 1200 | 21.2 | 1431 | 1227 | 19.8 | 12.8 | 22.3 | 29.0 | 5 | 362 | 359 | 5851 | 5749 | 7 | 1.64 | 2.6  | 182 | 474 | 62 | 4.089 | 0.053 | 4.769 | 4.685 |
| San Pedro | SDC46 | 1114 | 21.9 | 1415 | 1211 | 20.6 | 13.5 | 22.9 | 29.7 | 5 | 361 | 355 | 6093 | 5970 | 7 | 1.66 | 2.68 | 176 | 471 | 60 | 4.306 | 0.055 | 5.031 | 4.930 |
| San Pedro | SDC47 | 1093 | 22.0 | 1409 | 1205 | 20.7 | 13.6 | 23.1 | 29.8 | 5 | 361 | 355 | 6152 | 6028 | 6 | 1.67 | 2.7  | 174 | 470 | 60 | 4.366 | 0.056 | 5.105 | 5.002 |
| El Tizne  | SDC11 | 1301 | 20.5 | 1343 | 1160 | 18.8 | 11.7 | 21.8 | 28.6 | 3 | 363 | 363 | 5602 | 5547 | 7 | 1.57 | 2.45 | 182 | 445 | 57 | 4.171 | 0.056 | 4.829 | 4.782 |
| El Tizne  | SDC12 | 1284 | 20.6 | 1344 | 1159 | 19.0 | 11.9 | 21.9 | 28.7 | 3 | 363 | 363 | 5650 | 5594 | 7 | 1.58 | 2.46 | 181 | 445 | 58 | 4.204 | 0.056 | 4.875 | 4.827 |
| El Tizne  | SDC13 | 1254 | 20.9 | 1351 | 1163 | 19.3 | 12.1 | 22.1 | 28.9 | 3 | 363 | 363 | 5736 | 5680 | 7 | 1.58 | 2.47 | 181 | 447 | 58 | 4.246 | 0.056 | 4.932 | 4.884 |
| El Tizne  | SDC14 | 1290 | 20.6 | 1345 | 1160 | 18.9 | 11.8 | 21.8 | 28.7 | 3 | 363 | 363 | 5632 | 5576 | 7 | 1.57 | 2.45 | 182 | 445 | 58 | 4.187 | 0.056 | 4.855 | 4.807 |
| El Tizne  | SDC15 | 1288 | 20.6 | 1350 | 1163 | 19.0 | 11.9 | 21.8 | 28.7 | 3 | 363 | 363 | 5635 | 5579 | 7 | 1.57 | 2.45 | 182 | 446 | 58 | 4.174 | 0.056 | 4.845 | 4.797 |
| El Tizne  | SDC16 | 1295 | 20.5 | 1346 | 1160 | 18.9 | 11.8 | 21.8 | 28.7 | 3 | 363 | 363 | 5614 | 5559 | 7 | 1.57 | 2.45 | 182 | 445 | 58 | 4.171 | 0.056 | 4.840 | 4.792 |
| El Tizne  | SDC17 | 1295 | 20.5 | 1354 | 1167 | 18.9 | 11.8 | 21.8 | 28.6 | 3 | 363 | 363 | 5611 | 5556 | 7 | 1.58 | 2.45 | 183 | 448 | 58 | 4.144 | 0.055 | 4.808 | 4.761 |
| El Tizne  | SDC18 | 1294 | 20.5 | 1352 | 1165 | 18.9 | 11.8 | 21.8 | 28.6 | 3 | 363 | 363 | 5614 | 5559 | 7 | 1.58 | 2.46 | 182 | 447 | 58 | 4.152 | 0.055 | 4.819 | 4.772 |
| Las Tejas | SDC01 | 1284 | 20.7 | 1321 | 1141 | 19.0 | 11.8 | 22.0 | 28.9 | 3 | 363 | 363 | 5665 | 5609 | 7 | 1.56 | 2.43 | 180 | 438 | 56 | 4.288 | 0.057 | 4.965 | 4.916 |
| Las Tejas | SDC02 | 1355 | 20.1 | 1310 | 1137 | 18.4 | 11.3 | 21.5 | 28.4 | 3 | 364 | 364 | 5468 | 5428 | 8 | 1.56 | 2.4  | 181 | 434 | 55 | 4.174 | 0.056 | 4.809 | 4.774 |
| Las Tejas | SDC03 | 1326 | 20.4 | 1315 | 1139 | 18.6 | 11.5 | 21.6 | 28.6 | 3 | 363 | 363 | 5548 | 5494 | 7 | 1.56 | 2.42 | 180 | 436 | 55 | 4.219 | 0.057 | 4.871 | 4.824 |
| Las Tejas | SDC04 | 1269 | 20.8 | 1324 | 1142 | 19.1 | 11.9 | 22.1 | 29.0 | 3 | 363 | 363 | 5704 | 5648 | 7 | 1.57 | 2.43 | 180 | 438 | 56 | 4.308 | 0.057 | 4.995 | 4.946 |
| Las Tejas | SDC05 | 1294 | 20.6 | 1324 | 1144 | 18.9 | 11.7 | 21.9 | 28.8 | 3 | 363 | 363 | 5629 | 5574 | 7 | 1.57 | 2.44 | 180 | 439 | 56 | 4.252 | 0.057 | 4.920 | 4.872 |
| Las Tejas | SDC06 | 1305 | 20.5 | 1326 | 1146 | 18.8 | 11.7 | 21.8 | 28.7 | 3 | 363 | 363 | 5599 | 5545 | 7 | 1.56 | 2.43 | 181 | 439 | 56 | 4.222 | 0.056 | 4.886 | 4.839 |
| Las Tejas | SDC07 | 1290 | 20.6 | 1331 | 1150 | 18.9 | 11.8 | 21.9 | 28.8 | 3 | 363 | 363 | 5638 | 5583 | 7 | 1.57 | 2.44 | 181 | 441 | 56 | 4.236 | 0.056 | 4.903 | 4.855 |
| Las Tejas | SDC08 | 1301 | 20.5 | 1330 | 1150 | 18.8 | 11.7 | 21.8 | 28.7 | 3 | 363 | 363 | 5605 | 5550 | 7 | 1.57 | 2.44 | 181 | 441 | 56 | 4.214 | 0.056 | 4.874 | 4.826 |
| Las Tejas | SDC09 | 1312 | 20.4 | 1330 | 1150 | 18.8 | 11.6 | 21.7 | 28.6 | 3 | 363 | 363 | 5578 | 5523 | 7 | 1.57 | 2.44 | 181 | 441 | 56 | 4.194 | 0.056 | 4.850 | 4.803 |
| Las Tejas | SDC10 | 1282 | 20.7 | 1336 | 1153 | 19.0 | 11.9 | 21.9 | 28.8 | 3 | 363 | 363 | 5662 | 5606 | 7 | 1.57 | 2.45 | 181 | 443 | 57 | 4.238 | 0.056 | 4.911 | 4.862 |
| El Nanche | SDC19 | 1314 | 20.5 | 1304 | 1129 | 18.7 | 11.5 | 21.8 | 28.7 | 3 | 363 | 363 | 5590 | 5536 | 7 | 1.55 | 2.41 | 179 | 432 | 55 | 4.287 | 0.057 | 4.951 | 4.903 |
| El Nanche | SDC20 | 1299 | 20.6 | 1305 | 1129 | 18.9 | 11.7 | 21.9 | 28.8 | 3 | 363 | 363 | 5629 | 5574 | 7 | 1.55 | 2.41 | 179 | 432 | 55 | 4.313 | 0.057 | 4.986 | 4.937 |

|           |       |      |      |      |      |      |      |      |      |   |     |     |      |      |   |      |      |     |     |    |       |       |       |       |
|-----------|-------|------|------|------|------|------|------|------|------|---|-----|-----|------|------|---|------|------|-----|-----|----|-------|-------|-------|-------|
| El Nanche | SDC21 | 1290 | 20.7 | 1304 | 1127 | 19.0 | 11.7 | 22.0 | 28.9 | 3 | 363 | 363 | 5665 | 5609 | 7 | 1.56 | 2.41 | 179 | 432 | 55 | 4.344 | 0.058 | 5.027 | 4.977 |
| El Nanche | SDC22 | 1312 | 20.5 | 1300 | 1125 | 18.8 | 11.5 | 21.8 | 28.8 | 3 | 363 | 363 | 5599 | 5544 | 7 | 1.55 | 2.4  | 179 | 430 | 55 | 4.307 | 0.058 | 4.977 | 4.928 |
| El Nanche | SDC23 | 1321 | 20.4 | 1297 | 1124 | 18.7 | 11.5 | 21.8 | 28.7 | 3 | 363 | 363 | 5575 | 5521 | 7 | 1.55 | 2.4  | 179 | 430 | 54 | 4.298 | 0.058 | 4.960 | 4.912 |
| El Nanche | SDC24 | 1347 | 20.2 | 1286 | 1118 | 18.5 | 11.2 | 21.6 | 28.6 | 3 | 363 | 364 | 5507 | 5453 | 8 | 1.55 | 2.39 | 179 | 427 | 52 | 4.282 | 0.058 | 4.926 | 4.877 |
| El Nanche | SDC25 | 1390 | 19.9 | 1278 | 1114 | 18.1 | 10.9 | 21.3 | 28.3 | 3 | 363 | 364 | 5391 | 5338 | 8 | 1.54 | 2.37 | 179 | 425 | 52 | 4.218 | 0.057 | 4.839 | 4.792 |
| El Nanche | SDC26 | 1335 | 20.3 | 1290 | 1121 | 18.6 | 11.3 | 21.7 | 28.6 | 3 | 363 | 363 | 5537 | 5483 | 7 | 1.55 | 2.39 | 179 | 428 | 52 | 4.292 | 0.058 | 4.939 | 4.891 |
| El Nanche | SDC27 | 1330 | 20.4 | 1296 | 1124 | 18.6 | 11.4 | 21.7 | 28.7 | 3 | 363 | 363 | 5549 | 5495 | 7 | 1.55 | 2.4  | 179 | 430 | 54 | 4.282 | 0.057 | 4.937 | 4.889 |
| El Nanche | SDC28 | 1335 | 20.3 | 1304 | 1130 | 18.6 | 11.4 | 21.6 | 28.6 | 3 | 363 | 363 | 5531 | 5477 | 7 | 1.56 | 2.41 | 179 | 432 | 55 | 4.242 | 0.057 | 4.895 | 4.847 |
| El Nanche | SDC29 | 1298 | 20.6 | 1313 | 1136 | 18.9 | 11.7 | 21.9 | 28.8 | 3 | 363 | 363 | 5629 | 5574 | 7 | 1.56 | 2.44 | 179 | 436 | 55 | 4.287 | 0.057 | 4.955 | 4.907 |

mat: Mean annual temperature degrees C, map: Mean annual precipitation, gsp: Growing season precipitation, April to September, mtcn: Mean temperature in the coldest month degrees C, mmin: Mean minimum temperature in the coldest month degrees C, mtwm: Mean temperature in the warmest month degrees C, mmax: Mean maximum temperature in the warmest month degrees C, sday: Julian date of the last freezing date of spring, fday: Julian date of the first freezing date of autumn, ffp: Length of the frost-free period, dd5: Degree-days >5 degrees C (based on mean monthly temperature), gsdd5: Degree-days >5 degrees C accumulating within the frost-free period, d100: Julian date the sum of degree-days >5 degrees C reaches 100, dd0: Degree-days <0 degrees C (based on mean monthly temperature), mmindd0: Degree-days <0 degrees C (based on mean minimum monthly temperature), smrpb: Summer precipitation balance: (jul+aug+sep)/(apr+may+jun), smrsprpb: Summer/Spring precipitation balance: (jul+aug)/(apr+may), sprp: Spring precipitation (apr+may), smrp: Summer precipitation (jul+aug), winp: Winter precipitation (nov+dec+jan+feb), adi: Annual dryness index (dd5/map), ami: annual moisture index (qrt(dd5)/map), sdi: Summer dryness index (dd5/gsp), smi: summer moisture index (gsdd5/gsp).

**Table S2.** General average, minimum and maximum values of emergence parameters and number of cotyledons of superior resin trees of *Pinus oocarpa*, classified into high values (statistically equal to the highest value), intermediate and low (statistically equal to the lowest value).

| Emergence parameters    | Mean  | Trees with higher values |                                                                                                                                                                                                         | Trees with intermediate values |                                                                                                                                                                                                                                       | Trees with low values |                                                                                                                          |
|-------------------------|-------|--------------------------|---------------------------------------------------------------------------------------------------------------------------------------------------------------------------------------------------------|--------------------------------|---------------------------------------------------------------------------------------------------------------------------------------------------------------------------------------------------------------------------------------|-----------------------|--------------------------------------------------------------------------------------------------------------------------|
|                         |       | Min., Max.               | Superior trees                                                                                                                                                                                          | Min., Max.                     | Superior trees                                                                                                                                                                                                                        | Min., Max.            | Superior trees                                                                                                           |
| Emergency capacity (%)  | 56.81 | 76.9, 90.00              | SDC41, SDC43, SDC45, SDC33, SDC42, SDC47, SDC46, SDC44, SDC24, SDC18, SDC30, SDC32, SDC07, CR04, SDC10, SDC31, SDC40, CR06, SDC16, SDC17, SDC22, SDC19, SDC11, SDC21, SDC03, SDC14, SDC13, SDC28        | 52.5, 6.25                     | SDC02, SDC08, SDC09, SDC05, CR14, SDC23, SDC38, SDC29, SDC12, SDC36, SDC35, CR19, SDC27, SDC20, SDC04, SDC01, SDC34, SDC39, CR16, CR03, SDC25, CR18, SDC37, SDC15, CR13, CR26, CR08, CR17, ES03, CR21, ES06, ES11                     | 21.25, 50.30          | ES07, CR28, CR11, CR25, CR22, CR10, SDC06, CR01, CR02, CR15, CR27, SDC26, CR09, CR12, CR04, CR20, CR24, CR07, ES02       |
| Peak emergency value    | 3.74  | 5.66, 4.59               | SDC33, SDC47, SDC13, SDC46, SDC45, CR06, SDC41, SDC11, SDC10, CR04, SDC24, SDC12, SDC18, SDC42, SDC07, SDC30, SDC19, SDC31, SDC02, SDC08, SDC44, SDC21, SDC43, SDC40, SDC17, SDC14                      | 2.74, 4.51                     | SDC05, SDC08, SDC01, SDC16, SDC23, SDC03, SDC22, SDC38, SDC35, SDC36, CR19, SDC32, SDC20, SDC15, SDC09, SDC04, SDC27, CR08, SDC29, CR03, SDC25, CR13, CR14, SDC37, SDC39, CR17, SDC34, CR16, CR26, CR11, CR18, ES03, ES07, CR21, CR28 | 1.19, 2.62            | CR22, CR02, CR06, CR01, CR12, CR05, CR10, CR11, SDC06, SDC26, CR27, CR25, CR15, CR09, CR24, CR20, CR07, ES04, ES02       |
| Average daily emergency | 3.38  | 4.07, 5.54               | SDC13, SDC46, SDC47, SDC30, SDC41, SDC11, SDC12, SDC21, SDC40, SDC45, SDC31, CR06, SDC42, SDC02, SDC08, SDC23, SDC10, SDC24, SDC43, SDC01, CR04, CR19, SDC05, SDC36, SDC07, SDC44, SDC28, SDC18         | 2.54, 4.04                     | SDC14, SDC19, SDC22, SDC16, SDC04, SDC33, SDC35, SDC27, SDC17, SDC09, SDC20, CR08, SDC15, SDC03, SDC38, SDC25, CR13, CR03, CR17, SDC32, SDC29, SDC34, ES07, SDC39, CR14, CR18, CR21, ES11, CR26, SDC37, ES03, CR16, CR28, CR22        | 1.16, 2.40            | CR12, CR02, CR01, CR10, SDC06, SDC26, CR27, CR11, CR25, CR09, ES06, CR15, CR05, CR24, CR07, CR20, ES02, ES04             |
| Emergency value         | 14.08 | 19.89, 31.49             | SDC13, SDC47, SDC46, SDC41, SDC11, SDC30, SDC45, SDC12, CR06, SDC42, SDC10, SDC31, CR04, SDC21, SDC24, SDC40, SDC02, SDC07, SDC08, SDC18, SDC33, SDC43, SDC05, SDC19, SDC44, SDC01, SDC28, SDC23, SDC14 | 8.06, 19.66                    | SDC36, CR19, SDC22, SDC17, SDC35, SDC04, SDC03, SDC20, SDC15, SDC27, SDC38, SDC09, CR08, SDC32, SDC25, CR13, CR03, SDC29, CR17, SDC34, CR14, SDC39, ES07, CR18, ES11, CR26, SDC37, CR21, ES03, CR16                                   | 1.65, 7.09            | CR22, CR28, CR02, CR01, CR12, CR10, SDC06, SDC26, CR27, ES06, CR11, CR05, CR25, CR09, CR15, CR24, CR07, CR20, CR04, ES02 |

|                        |       |              |                                                                                                                         |              |                                                                                                                                                                                                                                                                                                                                       |             |                                                                                                                         |
|------------------------|-------|--------------|-------------------------------------------------------------------------------------------------------------------------|--------------|---------------------------------------------------------------------------------------------------------------------------------------------------------------------------------------------------------------------------------------------------------------------------------------------------------------------------------------|-------------|-------------------------------------------------------------------------------------------------------------------------|
| Emergency energy (day) | 14.43 | 12.00, 13.50 | SDC13,SDC12, SDC10, SDC15, SDC33, SDC38, CR08, SDC05, SDC01, CR03, SDC46, SDC18, SDC02, CR04, SDC31, CR12, SDC07, SDC03 | 13.75, 15.67 | SDC17, SDC19, SDC08, SDC21, CR06, CR02, CR07, SDC20, SDC47, SDC09, SDC28, SDC14, SDC23, SDC04, SDC35, ES07, SDC26, SDC16, SDC24, SDC30, SDC22, SDC42, CR19, SDC29, SDC45, SDC25, SDC41, SDC43, SDC32, SDC40, CR27, SDC44, SDC36, CR17, SDC39, ES03, CR09, CR21, CR13, SDC27, CR05, CR16, ES11, CR18, CR26, CR20                       | 15.75, 17.5 | SCD34, CR22, CR10, ES02, SDC06, CR01, CR24, CR14, CR28, ES04, CR11, CR15, SDC37, ES06, CR25                             |
| Number of cotyledons   | 5.9   | 6.14, 6.77   | SDC03, SDC32, CR10, SDC46, ES04, SDC19, CR21, SDC02, SDC33, ES07, CR15, SDC29, CR20                                     | 5.67, 6.12   | R18, CR17, SDC25, SDC47, SDC27, ES02, SDC18, CR03, SDC39, SDC01, SDC42, SDC45, CR06, CR04, CR08, SDC21, CR12, SDC14, CR28, SDC16, CR25, CR13, CR017, SDC2, ES03, SDC28, SDC12, SDC35, CR24, SDC23, ES06, SDC17, SDC13, SDC04, SDC30, SDC24, CR27, SDC36, CR22, CR19, CR26, SDC31, SDC07, SDC43, CR07, CR14, CR01, SDC22, SDC34, SDC11 | 5.13, 5.66  | CR09, SDC40, ES11, SDC10, CR16, SDC15, SDC44, SDC38, CR11, SDC41, SDC09, SDC20, CR05, SDC05, SDC26, SDC08, SDC06, SDC37 |

**Table S3.** Spearman correlation coefficients of elevation and environmental variables *vs.* emergence parameters and number of cotyledons of *Pinus oocarpa* trees in the Southern Mountains of Oaxaca, Mexico.

|          | Emergency capacity | Peak emergency value | Average daily emergency | Emergency value | Emergency energy | Number of cotyledons |
|----------|--------------------|----------------------|-------------------------|-----------------|------------------|----------------------|
| elev     | 0.53               | 0.53                 | 0.52                    | 0.53            | -0.50            | -0.13                |
|          | <0.0001            | <0.0001              | <0.0001                 | <0.0001         | <0.0001          | 0.239                |
| mat      | -0.53              | -0.53                | -0.52                   | -0.54           | 0.52             | 0.13                 |
|          | <0.0001            | <0.0001              | <0.0001                 | <0.0001         | <0.0001          | 0.2494               |
| map      | -0.52              | -0.54                | -0.55                   | -0.55           | 0.44             | 0.11                 |
|          | <0.0001            | <0.0001              | <0.0001                 | <0.0001         | <0.0001          | 0.3164               |
| gsp      | -0.52              | -0.53                | -0.54                   | -0.55           | 0.44             | 0.12                 |
|          | <0.0001            | <0.0001              | <0.0001                 | <0.0001         | <0.0001          | 0.3069               |
| mtcm     | -0.53              | -0.54                | -0.52                   | -0.54           | 0.51             | 0.14                 |
|          | <0.0001            | <0.0001              | <0.0001                 | <0.0001         | <0.0001          | 0.2216               |
| mmin     | -0.53              | -0.54                | -0.52                   | -0.54           | 0.51             | 0.13                 |
|          | <0.0001            | <0.0001              | <0.0001                 | <0.0001         | <0.0001          | 0.2447               |
| mtwm     | -0.53              | -0.54                | -0.52                   | -0.54           | 0.53             | 0.13                 |
|          | <0.0001            | <0.0001              | <0.0001                 | <0.0001         | <0.0001          | 0.2608               |
| mmax     | -0.53              | -0.56                | -0.53                   | -0.55           | 0.55             | 0.14                 |
|          | <0.0001            | <0.0001              | <0.0001                 | <0.0001         | <0.0001          | 0.229                |
| sday     | -0.13              | -0.25                | -0.24                   | -0.25           | 0.50             | 0.10                 |
|          | 0.2449             | 0.0238               | 0.0324                  | 0.0266          | <0.0001          | 0.3911               |
| fday     | 0.53               | 0.57                 | 0.56                    | 0.57            | -0.54            | -0.14                |
|          | <0.0001            | <0.0001              | <0.0001                 | <0.0001         | <0.0001          | 0.2306               |
| ffp      | 0.51               | 0.54                 | 0.53                    | 0.54            | -0.52            | -0.16                |
|          | <0.0001            | <0.0001              | <0.0001                 | <0.0001         | <0.0001          | 0.158                |
| dd5      | -0.53              | -0.54                | -0.52                   | -0.54           | 0.52             | 0.13                 |
|          | <0.0001            | <0.0001              | <0.0001                 | <0.0001         | <0.0001          | 0.2654               |
| gsdd5    | -0.53              | -0.54                | -0.52                   | -0.54           | 0.52             | 0.13                 |
|          | <0.0001            | <0.0001              | <0.0001                 | <0.0001         | <0.0001          | 0.2661               |
| d100     | 0.61               | 0.60                 | 0.60                    | 0.61            | -0.46            | -0.17                |
|          | <0.0001            | <0.0001              | <0.0001                 | <0.0001         | <0.0001          | 0.1368               |
| smrpb    | -0.52              | -0.54                | -0.54                   | -0.55           | 0.52             | 0.07                 |
|          | <0.0001            | <0.0001              | <0.0001                 | <0.0001         | <0.0001          | 0.5316               |
| smrsprpb | -0.52              | -0.53                | -0.53                   | -0.54           | 0.52             | 0.11                 |
|          | <0.0001            | <0.0001              | <0.0001                 | <0.0001         | <0.0001          | 0.3173               |
| sprp     | 0.57               | 0.60                 | 0.58                    | 0.60            | -0.56            | -0.18                |
|          | <0.0001            | <0.0001              | <0.0001                 | <0.0001         | <0.0001          | 0.1184               |
| smrp     | -0.52              | -0.53                | -0.54                   | -0.55           | 0.44             | 0.11                 |
|          | <0.0001            | <0.0001              | <0.0001                 | <0.0001         | <0.0001          | 0.3115               |
| winp     | 0.55               | 0.50                 | 0.47                    | 0.48            | -0.29            | -0.11                |
|          | <0.0001            | <0.0001              | <0.0001                 | <0.0001         | 0.0093           | 0.333                |
| adi      | -0.32              | -0.33                | -0.29                   | -0.31           | 0.34             | 0.09                 |
|          | 0.0038             | 0.0029               | 0.009                   | 0.0058          | 0.0019           | 0.4394               |
| ami      | 0.35               | 0.38                 | 0.41                    | 0.41            | -0.32            | -0.08                |
|          | 0.0013             | 0.0004               | 0.0002                  | 0.0002          | 0.0042           | 0.4806               |
| sdi      | -0.13              | -0.17                | -0.13                   | -0.14           | 0.32             | 0.02                 |
|          | 0.2418             | 0.1261               | 0.2527                  | 0.2004          | 0.0043           | 0.8518               |
| smi      | -0.06              | -0.08                | -0.03                   | -0.05           | 0.22             | 0.00                 |
|          | 0.6169             | 0.498                | 0.765                   | 0.6807          | 0.0485           | 0.9914               |

elvev: elevation m asl, mat: Mean annual temperature degrees C, map: Mean annual precipitation, gsp: Growing season precipitation, April to September, mtcn: Mean temperature in the coldest month degrees C, mmin: Mean minimum temperature in the coldest month degrees C, mtwn: Mean temperature in the warmest month degrees C, mmax: Mean maximum temperature in the warmest month degrees C, sday: Julian date of the last freezing date of spring, fday: Julian date of the first freezing date of autumn, ffp: Length of the frost-free period, dd5: Degree-days >5 degrees C (based on mean monthly temperature), gsdd5: Degree-days >5 degrees C accumulating within the frost-free period, d100: Julian date the sum of degree-days >5 degrees C reaches 100, dd0: Degree-days <0 degrees C (based on mean monthly temperature), mmindd0: Degree-days <0 degrees C (based on mean minimum monthly temperature), smrp: Summer precipitation balance: (jul+aug+sep)/(apr+may+jun), smrsprp: Summer/Spring precipitation balance: (jul+aug)/(apr+may), sprp: Spring precipitation (apr+may), smrp: Summer precipitation (jul+aug), winp: Winter precipitation (nov+dec+jan+feb), adi: Annual dryness index (dd5/map), ami: annual moisture index (qrt(dd5)/map), sdi: Summer dryness index (dd5/gsp), smi: summer moisture index (gsdd5/gsp).
